# Supplementary material
Source: PubMed Central journal article supplement (PMC5784404)

## **SUPPLEMENTARY APPENDIX**

### **Supplementary Figure Legend**

**Supplementary Figure 1. Distribution of baseline total testosterone levels.**

**Supplementary Figure 2. Association between baseline total testosterone gradations and all-cause mortality in dialysis patients.** Figures present hazard ratios (short-dashed lines indicate 95% CIs) for total testosterone analyzed as a spline with knots at the 33<sup>rd</sup> and 66<sup>th</sup> percentiles of observed values (total testosterone levels 227 and 361ng/dl, respectively). A histogram of observed baseline testosterone values and a hazard reference ratio of 1 (long-dashed line) is overlaid. Testosterone levels exceeding the 97.5<sup>th</sup> percentile of observed values were excluded for the purposes of the spline analyses. Case-mix adjusted analyses adjusted for calendar quarter of study entry, age, sex, race/ethnicity, and diabetes; Expanded case-mix models adjusted for case-mix model covariates, as well as dialysis vintage, cause of end-stage renal disease, modality, dialysis access, congestive heart failure, coronary heart disease, and serum albumin level.

**Supplementary Table 1. Distribution of total testosterone levels across age strata.**

| <b>Age (years)</b> | <b>N</b> | <b>Mean <math>\pm</math> SD</b><br><b>Total Testosterone (ng/dl)</b> | <b>Median (IQR)</b><br><b>Total Testosterone (ng/dl)</b> |
|--------------------|----------|----------------------------------------------------------------------|----------------------------------------------------------|
| <b>&lt; 40</b>     | 66       | 371 $\pm$ 222                                                        | 336 (224, 480)                                           |
| <b>40-60</b>       | 289      | 353 $\pm$ 179                                                        | 338 (232, 458)                                           |
| <b>&gt; 60</b>     | 269      | 280 $\pm$ 192                                                        | 247 (158, 359)                                           |

**Supplementary Table 2. Association between testosterone quartile and all-cause mortality.**

| Quartile | Minimally adjusted |        | Case-mix adjusted |        | Expanded case-mix + laboratory adjusted |       |
|----------|--------------------|--------|-------------------|--------|-----------------------------------------|-------|
|          | HR (95%CI)         | p*     | HR (95%CI)        | p**    | HR (95%CI)                              | p***  |
| <b>1</b> | 2.63 (1.57-4.41)   | <0.001 | 2.17 (1.28-3.69)  | <0.001 | 2.32 (1.33-4.06)                        | 0.003 |
| <b>2</b> | 1.72 (0.99-2.99)   | 0.06   | 1.59 (0.91-2.79)  | 0.11   | 1.80 (0.99-3.28)                        | 0.05  |
| <b>3</b> | 1 (ref)            | N/A    | 1 (ref)           | N/A    | 1 (ref)                                 | N/A   |
| <b>4</b> | 0.54 (0.26-1.12)   | 0.10   | 0.61 (0.29-1.26)  | 0.18   | 0.68 (0.32-1.42)                        | 0.30  |

*\*Minimally adjusted analyses p-for-trend: <0.001. \*\*Case-mix analyses p-for-trend: <0.001. \*\*\*Expanded case-mix+laboratory analyses p-for-trend: 0.001. Minimally adjusted analyses adjusted for calendar quarter of study entry; Case-mix adjusted analyses adjusted for minimally adjusted model covariates, as well as age, sex, race/ethnicity, and diabetes; Expanded case-mix models adjusted for case-mix model covariates, as well as dialysis vintage, cause of end-stage renal disease, modality, dialysis access, congestive heart failure, coronary heart disease, and serum albumin level.*

**Supplementary Table 3. Associations between baseline total testosterone level (dichotomized as total testosterone level <300ng/dl vs. ≥300ng/dl; reference: total testosterone ≥300ng/dl) and all-cause mortality.**

| Subgroups              | Minimally adjusted |               | Case-mix adjusted |               | Expanded case-mix + laboratory adjusted |               |
|------------------------|--------------------|---------------|-------------------|---------------|-----------------------------------------|---------------|
|                        | HR (95% CI)        | p-interaction | HR (95% CI)       | p-interaction | HR (95% CI)                             | p-interaction |
| <b>Age</b>             |                    |               |                   |               |                                         |               |
| <55 years old          | 2.57 (1.18, 5.63)  | 0.72          | 2.96 (1.36, 6.40) | 0.78          | 4.90 (1.81, 13.2)                       | 0.74          |
| ≥55 years old          | 2.81 (1.63, 4.84)  |               | 2.37 (1.36, 4.12) |               | 2.42 (1.31, 4.50)                       |               |
| <b>Race</b>            |                    |               |                   |               |                                         |               |
| Black                  | 8.44 (2.97, 24.0)  | 0.03          | 7.72 (2.66, 22.5) | 0.03          | 9.87 (2.84, 34.3)                       | 0.07          |
| Non-Black              | 1.86 (1.14, 3.04)  |               | 1.63 (1.00, 2.66) |               | 1.65 (0.96, 2.84)                       |               |
| <b>Diabetes</b>        |                    |               |                   |               |                                         |               |
| Presence               | 2.94 (1.75, 4.95)  | 0.77          | 2.40 (1.42, 4.08) | 0.86          | 2.64 (1.50, 4.65)                       | 0.77          |
| Absence                | 3.19 (1.44, 7.06)  |               | 2.42 (1.07, 5.47) |               | 2.35 (0.92, 5.97)                       |               |
| <b>CHF</b>             |                    |               |                   |               |                                         |               |
| Presence               | 4.99 (2.37, 10.5)  | 0.07          | 4.13 (1.94, 8.82) | 0.08          | 3.94 (1.74, 8.93)                       | 0.15          |
| Absence                | 2.13 (1.20, 3.78)  |               | 1.67 (0.91, 3.04) |               | 1.88 (0.97, 3.63)                       |               |
| <b>CHD</b>             |                    |               |                   |               |                                         |               |
| Presence               | 5.10 (1.85, 14.1)  | 0.28          | 4.81 (1.68, 13.8) | 0.13          | 28.3 (5.27, 152)                        | 0.04          |
| Absence                | 2.52 (1.55, 4.09)  |               | 1.81 (1.10, 3.00) |               | 1.73 (1.01, 2.97)                       |               |
| <b>Modality</b>        |                    |               |                   |               |                                         |               |
| Hemodialysis           | 3.77 (2.27, 6.26)  | 0.04          | 3.07 (1.83, 5.15) | 0.15          | 3.02 (1.74, 5.24)                       | 0.11          |
| Peritoneal dialysis    | 1.02 (0.37, 2.78)  |               | 0.82 (0.27, 2.46) |               | 2.35 (0.54, 10.3)                       |               |
| <b>Serum albumin</b>   |                    |               |                   |               |                                         |               |
| <4.0 g/dl              | 3.04 (1.86, 4.97)  | 0.37          | 2.75 (1.67, 4.54) | 0.15          | 2.89 (1.72, 4.86)                       | 0.07          |
| ≥4.0 g/dl              | 3.23 (1.23, 8.47)  |               | 1.74 (0.62, 4.90) |               | 1.63 (0.44, 6.09)                       |               |
| <b>Vintage</b>         |                    |               |                   |               |                                         |               |
| <1 year                | 3.93 (2.09, 7.38)  | 0.56          | 2.59 (1.35, 4.94) | 0.69          | 2.69 (1.36, 5.32)                       | 0.49          |
| ≥1 year                | 2.31 (1.26, 4.26)  |               | 2.16 (1.17, 4.00) |               | 2.42 (1.23, 4.76)                       |               |
| <b>Body mass index</b> |                    |               |                   |               |                                         |               |
| <25 kg/m <sup>2</sup>  | 3.88 (1.86, 8.09)  | 0.20          | 3.76 (1.80, 7.84) | 0.26          | 4.75 (1.92, 11.76)                      | 0.46          |
| ≥25 kg/m <sup>2</sup>  | 4.40 (1.99, 9.74)  |               | 3.71 (1.64, 8.40) |               | 3.35 (1.39, 8.08)                       |               |

*Minimally adjusted analyses adjusted for calendar quarter of study entry; Case-mix adjusted analyses adjusted for minimally adjusted model covariates, as well as age, sex, race/ethnicity, and diabetes; Expanded case-mix models adjusted for case-mix model covariates, as well as dialysis vintage, cause of end-stage renal disease, modality, dialysis access, congestive heart failure, coronary heart disease, and serum albumin level.*

Supplementary Figure 1.

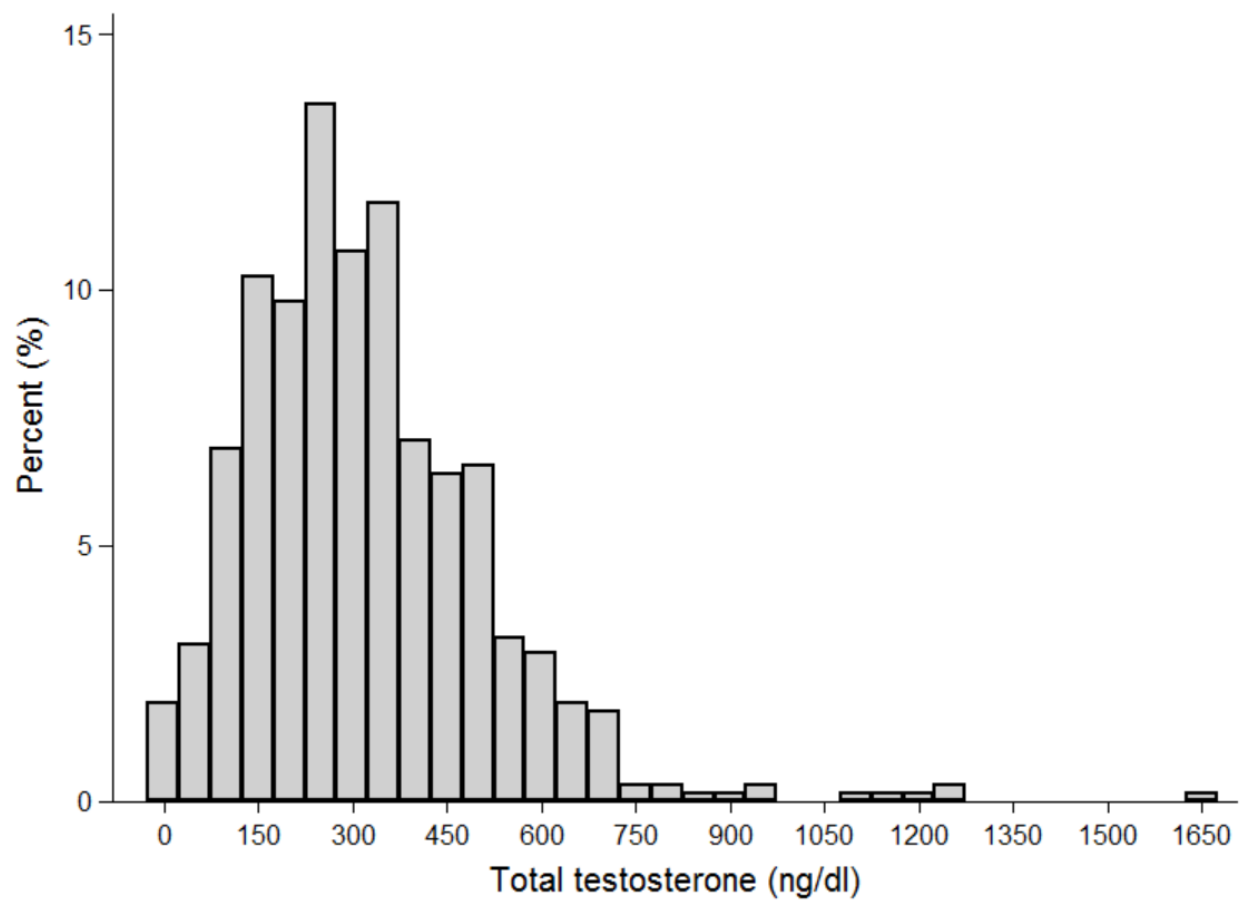

Supplementary Figure 2.

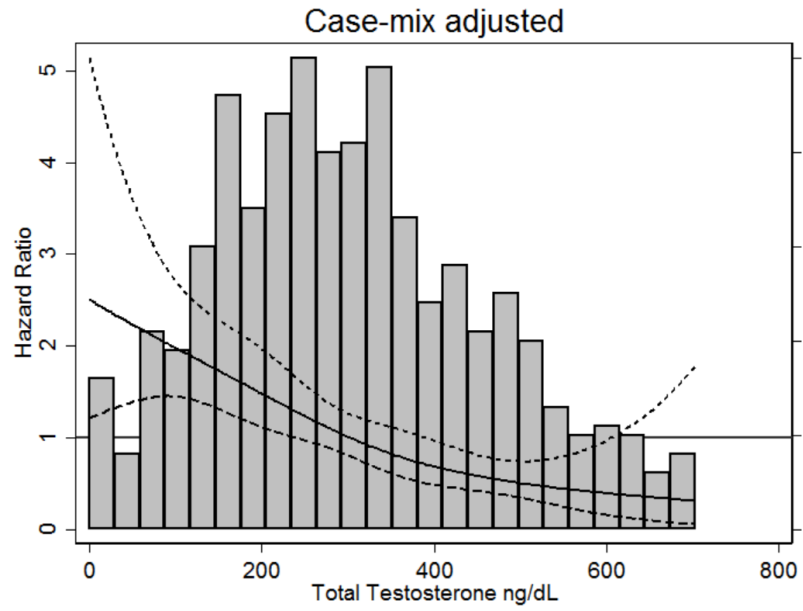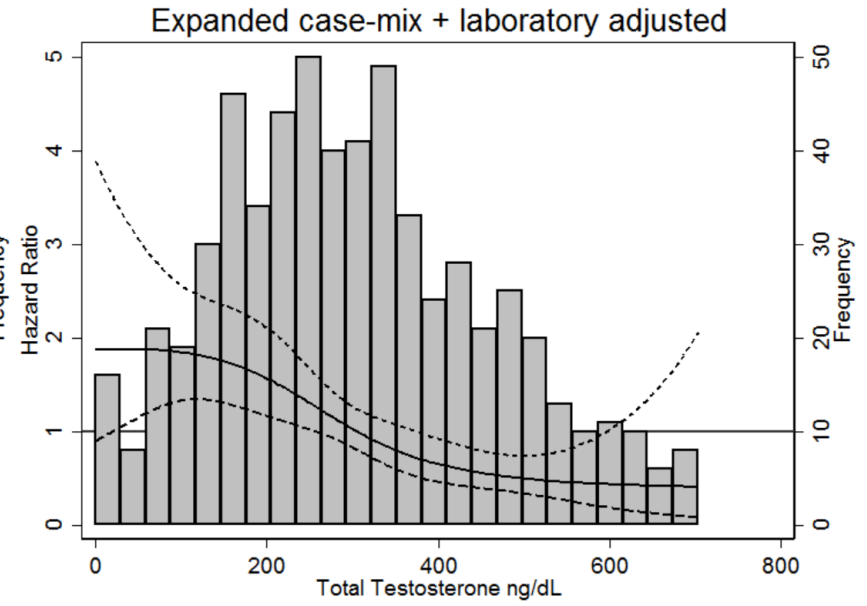

## **SUPPLEMENTARY APPENDIX**

### **Supplementary Figure Legend**

**Supplementary Figure 1. Distribution of baseline total testosterone levels.**

**Supplementary Figure 2. Association between baseline total testosterone gradations and all-cause mortality in dialysis patients.** Figures present hazard ratios (short-dashed lines indicate 95% CIs) for total testosterone analyzed as a spline with knots at the 33<sup>rd</sup> and 66<sup>th</sup> percentiles of observed values (total testosterone levels 227 and 361ng/dl, respectively). A histogram of observed baseline testosterone values and a hazard reference ratio of 1 (long-dashed line) is overlaid. Testosterone levels exceeding the 97.5<sup>th</sup> percentile of observed values were excluded for the purposes of the spline analyses. Case-mix adjusted analyses adjusted for calendar quarter of study entry, age, sex, race/ethnicity, and diabetes; Expanded case-mix models adjusted for case-mix model covariates, as well as dialysis vintage, cause of end-stage renal disease, modality, dialysis access, congestive heart failure, coronary heart disease, and serum albumin level.



**Supplementary Table 1. Distribution of total testosterone levels across age strata.**

| <b>Age (years)</b> | <b>N</b> | <b>Mean <math>\pm</math> SD</b><br><b>Total Testosterone (ng/dl)</b> | <b>Median (IQR)</b><br><b>Total Testosterone (ng/dl)</b> |
|--------------------|----------|----------------------------------------------------------------------|----------------------------------------------------------|
| <b>&lt; 40</b>     | 66       | 371 $\pm$ 222                                                        | 336 (224, 480)                                           |
| <b>40-60</b>       | 289      | 353 $\pm$ 179                                                        | 338 (232, 458)                                           |
| <b>&gt; 60</b>     | 269      | 280 $\pm$ 192                                                        | 247 (158, 359)                                           |

**Supplementary Table 2. Association between testosterone quartile and all-cause mortality.**

| Quartile | Minimally adjusted |        | Case-mix adjusted |        | Expanded case-mix + laboratory adjusted |       |
|----------|--------------------|--------|-------------------|--------|-----------------------------------------|-------|
|          | HR (95%CI)         | p*     | HR (95%CI)        | p**    | HR (95%CI)                              | p***  |
| <b>1</b> | 2.63 (1.57-4.41)   | <0.001 | 2.17 (1.28-3.69)  | <0.001 | 2.32 (1.33-4.06)                        | 0.003 |
| <b>2</b> | 1.72 (0.99-2.99)   | 0.06   | 1.59 (0.91-2.79)  | 0.11   | 1.80 (0.99-3.28)                        | 0.05  |
| <b>3</b> | 1 (ref)            | N/A    | 1 (ref)           | N/A    | 1 (ref)                                 | N/A   |
| <b>4</b> | 0.54 (0.26-1.12)   | 0.10   | 0.61 (0.29-1.26)  | 0.18   | 0.68 (0.32-1.42)                        | 0.30  |

*\*Minimally adjusted analyses p-for-trend: <0.001. \*\*Case-mix analyses p-for-trend: <0.001. \*\*\*Expanded case-mix+laboratory analyses p-for-trend: 0.001. Minimally adjusted analyses adjusted for calendar quarter of study entry; Case-mix adjusted analyses adjusted for minimally adjusted model covariates, as well as age, sex, race/ethnicity, and diabetes; Expanded case-mix models adjusted for case-mix model covariates, as well as dialysis vintage, cause of end-stage renal disease, modality, dialysis access, congestive heart failure, coronary heart disease, and serum albumin level.*

**Supplementary Table 3. Associations between baseline total testosterone level (dichotomized as total testosterone level <300ng/dl vs. ≥300ng/dl; reference: total testosterone ≥300ng/dl) and all-cause mortality.**

| Subgroups              | Minimally adjusted |               | Case-mix adjusted |               | Expanded case-mix + laboratory adjusted |               |
|------------------------|--------------------|---------------|-------------------|---------------|-----------------------------------------|---------------|
|                        | HR (95% CI)        | p-interaction | HR (95% CI)       | p-interaction | HR (95% CI)                             | p-interaction |
| <b>Age</b>             |                    |               |                   |               |                                         |               |
| <55 years old          | 2.57 (1.18, 5.63)  | 0.72          | 2.96 (1.36, 6.40) | 0.78          | 4.90 (1.81, 13.2)                       | 0.74          |
| ≥55 years old          | 2.81 (1.63, 4.84)  |               | 2.37 (1.36, 4.12) |               | 2.42 (1.31, 4.50)                       |               |
| <b>Race</b>            |                    |               |                   |               |                                         |               |
| Black                  | 8.44 (2.97, 24.0)  | 0.03          | 7.72 (2.66, 22.5) | 0.03          | 9.87 (2.84, 34.3)                       | 0.07          |
| Non-Black              | 1.86 (1.14, 3.04)  |               | 1.63 (1.00, 2.66) |               | 1.65 (0.96, 2.84)                       |               |
| <b>Diabetes</b>        |                    |               |                   |               |                                         |               |
| Presence               | 2.94 (1.75, 4.95)  | 0.77          | 2.40 (1.42, 4.08) | 0.86          | 2.64 (1.50, 4.65)                       | 0.77          |
| Absence                | 3.19 (1.44, 7.06)  |               | 2.42 (1.07, 5.47) |               | 2.35 (0.92, 5.97)                       |               |
| <b>CHF</b>             |                    |               |                   |               |                                         |               |
| Presence               | 4.99 (2.37, 10.5)  | 0.07          | 4.13 (1.94, 8.82) | 0.08          | 3.94 (1.74, 8.93)                       | 0.15          |
| Absence                | 2.13 (1.20, 3.78)  |               | 1.67 (0.91, 3.04) |               | 1.88 (0.97, 3.63)                       |               |
| <b>CHD</b>             |                    |               |                   |               |                                         |               |
| Presence               | 5.10 (1.85, 14.1)  | 0.28          | 4.81 (1.68, 13.8) | 0.13          | 28.3 (5.27, 152)                        | 0.04          |
| Absence                | 2.52 (1.55, 4.09)  |               | 1.81 (1.10, 3.00) |               | 1.73 (1.01, 2.97)                       |               |
| <b>Modality</b>        |                    |               |                   |               |                                         |               |
| Hemodialysis           | 3.77 (2.27, 6.26)  | 0.04          | 3.07 (1.83, 5.15) | 0.15          | 3.02 (1.74, 5.24)                       | 0.11          |
| Peritoneal dialysis    | 1.02 (0.37, 2.78)  |               | 0.82 (0.27, 2.46) |               | 2.35 (0.54, 10.3)                       |               |
| <b>Serum albumin</b>   |                    |               |                   |               |                                         |               |
| <4.0 g/dl              | 3.04 (1.86, 4.97)  | 0.37          | 2.75 (1.67, 4.54) | 0.15          | 2.89 (1.72, 4.86)                       | 0.07          |
| ≥4.0 g/dl              | 3.23 (1.23, 8.47)  |               | 1.74 (0.62, 4.90) |               | 1.63 (0.44, 6.09)                       |               |
| <b>Vintage</b>         |                    |               |                   |               |                                         |               |
| <1 year                | 3.93 (2.09, 7.38)  | 0.56          | 2.59 (1.35, 4.94) | 0.69          | 2.69 (1.36, 5.32)                       | 0.49          |
| ≥1 year                | 2.31 (1.26, 4.26)  |               | 2.16 (1.17, 4.00) |               | 2.42 (1.23, 4.76)                       |               |
| <b>Body mass index</b> |                    |               |                   |               |                                         |               |
| <25 kg/m <sup>2</sup>  | 3.88 (1.86, 8.09)  | 0.20          | 3.76 (1.80, 7.84) | 0.26          | 4.75 (1.92, 11.76)                      | 0.46          |
| ≥25 kg/m <sup>2</sup>  | 4.40 (1.99, 9.74)  |               | 3.71 (1.64, 8.40) |               | 3.35 (1.39, 8.08)                       |               |

*Minimally adjusted analyses adjusted for calendar quarter of study entry; Case-mix adjusted analyses adjusted for minimally adjusted model covariates, as well as age, sex, race/ethnicity, and diabetes; Expanded case-mix models adjusted for case-mix model covariates, as well as dialysis vintage, cause of end-stage renal disease, modality, dialysis access, congestive heart failure, coronary heart disease, and serum albumin level.*

Supplementary Figure 1.



Supplementary Figure 2.



Supplement: NIHMS903968-supplement-supplement_1.pdf [file NIHMS903968-supplement-supplement_1.pdf]
